# Supplementary material for: Modulation of the Human Erythroid Plasma Membrane Calcium Pump (PMCA4b) Expression by Polymorphic Genetic Variants
Source: MDPI journal article supplement (doi:10.3390/membranes11080586), 2021-07-30
Supplement: s1 [file s1]

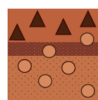

Article

# Modulation of the human erythroid plasma membrane calcium pump (PMCA4b) expression by polymorphic genetic variants

Orsolya Móznér <sup>1</sup>¶, Boglárka Zámbo <sup>2</sup>,¶,<sup>†</sup> and Balázs Sarkadi <sup>1,2,\*</sup>

<sup>1</sup> Institute of Enzymology, Research Centre for Natural Sciences, ELKH, Budapest, Hungary

<sup>2</sup> Department of Biophysics and Radiation Biology, Semmelweis University, Budapest, Hungary

¶ These authors contributed equally to this work.

<sup>†</sup> Current address of B.Z.: Institute of Genetics and Molecular and Cellular Biology (IGBMC), Illkirch, France

\* Corresponding author: sarkadi@biomembrane.hu

CCCCACTCTGAACCTGAGAAGGGGCGCTCAGGATAAGTTCTCTCCACCTTCAGCCCTCCGTATCGTCACCTACACCACACCCCTAGTTAGCAT  
GCGTGAGAGGTAATGCATCTTTCTGAGGGGAGAAATGCTGGCCTCTCTGCGCTTTATTGAGCTGATGTGAGACTCTGGTGCTCACTCAC  
AGGCTAGCTTGCTCTCCCTTGCTAACCTTGCTGTGGTCCCTATCCTCTATCTGAATTGAGAGGTATCTTATCGCTCCCACTCCAGAGAACTTTAAT  
GCTCAGGCTTCAAACCTCCCTATCTTCCCTCTCAGAGGTCCTTCTGTCCCTTTACTAAAAAAGTTACCCTGCGTCACCAACTGC  
CAAAGCATTTTACTCTCCTCTTCTCCCAAAAGCCTCTTGAGGAGGGTGGAGCTTAGCCTCAAGAACAAAACCTGGTGCCGCCAGGTTGAC  
ACCTGCACGGGCTGCAGAAATTCGTACACCTGGAGGCTGAGTACTCTAACGGGCTTTGGAGGATTTTGACATCTTCTATCAAGTTGTCTTTT  
CATACACCTGGAGGCTGAGTACTCTAAGGGGCTTTGGAAGATTTTGACATCTTCTATCAAGTTGTCTTCTTGTTGTAATGTGTGTGTTGGG  
AGTGGGAAGAGTGTGGGTTGTGGGAGAGGAAGGCAGACTGACAGGCCACCTTCAGATCACTTAGATCTGAACCTCTTTTCTGACCTCTTC  
TCATCTTTTATAGATAAGGTCAGACTAAAGGATCCTGTACAGGTCCTCAAATAGACAGGGAAAACATTAGAGCCATCAGAGGTCGTAACCA  
TTTATTTCCAAGTTTCTGAAGCTGTGGGTTTATGTTGCTTGGTTGGGAGAGGTGAGACGTGAAGACTCGGGTATTGAAATTACTCTCTACAT  
TGGAGTTTACAGGCTGCAGGGGCTCCAGGAAGGAACGGGCTCTCTTGAGTC

TTGCTTGGTTGGGAGAGGTGAGACGTGAAGACTCGGGTATTGAAATTACTCCTCTACATTGGAGTTTACAGGCTGCAGGGGCTCCAGGAA  
GGAACGGGCTCTCTTGAGTCAGCTCTTAAGCTCAGGCCTCAGCTATCAGTTCAGCTCAGATCTCAACTGTCACTTAAACCCTTGTGCTTAGA  
CTGGGTACCTCTTGCCCTTGCAATGCTGGATACTTATGGTTGCTCTAATGGTTTCTTTTGTCTATCTTTGAACCTTTATTCCAGAGATCCAGTT  
GTCATCGGTATCCAGGAAGCTCTCCTCTTCTCCTCTGACGTCTACCACTACAGTTGCTGGTTGTTGCTAAGGTTGCTGCCATGGTAACATGC  
ACATCCTGTTTACACCTTCATCTGGGCAAGTTGGTCTAAGCTAGGAACCTACCTACCCTGGACAACCACTATCATCACCACCTGGGGACACCAA  
TCATCGTGACACGGAGTCCACCTTCCACTCAGTTCCCCATCCTCTTCTCCTCTCGCTGCCAGACTTCATAGAGAAGAAAGGATCTAGACTTC  
GGACGGCTACTCGGGAGCTTATTGCACAAGATATATTCAATCTATTCCCTCACTGGGGCCCCAGAGAAGCAAGAAGTAGGAAGAAGTTGAGA  
CAGGGAGGCAGGAGACACTGGTCAGTTGAAGGGAAACGCTACATCTTCTCTGGTTGAGGGGCTTGGTAACAGCAGGCAAA

CTGGTGGGAAAGGTATGGCATCTGAAGCACTGAAAGGAGGGCAGGCCATGAAGAACTGTATCTTTCCAGAGATGATGTTTAGAAAGTGTG  
CTATTCTCTAAAGATTATTCCTTTCTCCTTTCTTTCTTTCTTTCTTTCTTTGTTCTTTTTTTTTTTTTTTTTTTTGTGGTGAGACAGGGTCCT  
GCTCTTTTACCCAGGCTGGAGTGCAGTGGCGTGATCATGGCTCACTGCAGCCTCAACCTCCTGGGCTGAAGCCATCTTCTACCTCAGTCTGCT  
GGGTAGCTAGGACCACAGGTGTGTGCCATCACACCCAGCTAGCTTTTAGATTTTTTTGTAGAGTTGAGGTCTCAGTATCTTGCTAGACTCAT  
CTCAAACCTCTGGACTTAAGTGATTCTTCCACCTTGGCCTCCCAAAGTGTTGGGATTACAGGCACAGTGAGCCACTGCTCCTGACCCCTCTTT  
CTCCTTTTTCTGTATCAGTGTCCAGAAAGGAGGATATTTATTTTTAAAATGTTTATGTTATAAATGTTGTTGTGAGTAAATAATCAAGTCTGTT  
TTCTATATGTCTGATTATAAAATAATTTAATTCTTCCCTACACTGATCTTACAGTTTAATGAATGGAGGAAGGAAGGGTACAAAAAAGTGAATA  
AGTCCAGCTGCCC

TGGATCACTCACTGTTTTGTGTCAAGGAATTATAAGTGATTTTTTTCAACTCTGCTGGATACACTTTTAAATGTAGTTCTCCTTAATCTTTTTGT  
TTGTTTTGTTTTTGTTTTTTGGTTTTTTGTTTTGAGAAGGAGTCTCACTCTTGTTGCCAGGCAGGCTGGAGTGCAATGGTGCAATCTTGGC  
TCACTGCAACCTCCACCTCCTGGATTCAAGCAATTATCCTGCTTCAGCCTCCTGAGTAGCTGGGGTTACAGGCATGTGGCTAATTTTGATTTTT  
AGTAGAGATGGAGTTTACCATTTTGACCACACTGGTCTCAAACCTCCTGACCTCAGGTGATCCGCTCACCTCAACCTCCCAAAGTGCTGGGATT  
ACAGGTATGAGCCACTGCGCCCGGCCCTTAATCTCTTCTTAAAGCTAAAAAACTTAAAGATAATGAAAAATTCAGCTTCAGGCTTTGGCCC  
AGCCCAGTTGCCCAGTGTGCCATGGTATTATGAAATTTGCCTCATCAAATGTAGAAAGAACAAAAGGAAACTTGCTTTTTCACTTTAGTCTG  
GTTTTAGCATCTCTGTAGCAGATTCTTACTTGGCCCTATACATCTGGCAGTTCATGGTTGAGTAGCATGAGATGGAGCAAAGATCTTGTCCATT  
AGGGGCTTTTCACTCTCATGTGGTCTCCTATTTCTGAATCTTCTCAGAGGCCACAGCATATTTCTACCAATTCTAAGAAGTTGTTACCTTTGC  
CAGTGCTGTATTATAAGTTAGTGACTTGGAGCCTAGACTCTTTAGGATGAAAAAGAGAAAGAGAGTTTTACATAGATATCTATACCTAGTTT  
ATGCTTATTTTCTTTACAACCTAAGGGAGCTTCCCTACCTGTTTTCTTTACTTCTAGAATTTGGTTTCTATCTCATAGGCTTTGAGTTCAAATG  
ATAGCTCCACCATTTACTAATAAGTAGCCCTTACAGTTTACTCAGCCTCCCTGAGTCTGTTTCTTCTTTGAAAATAATGTTAATAACACCTAG  
CCCATAGAGTTACTGAGATTAAATAATACATATACAGTGCTCATACTTATAAATTAGGTGTTCAATAGATTAGTTTTCTCAGATTA AACAGAGT  
CCATGCATCTGTAGATACTTGCCAGAACATGGGTG

**Figure S1.** DNA sequences inserted into pGL4-Firefly luciferase plasmid. Location of SNPs of the haplotype highlighted with yellow.

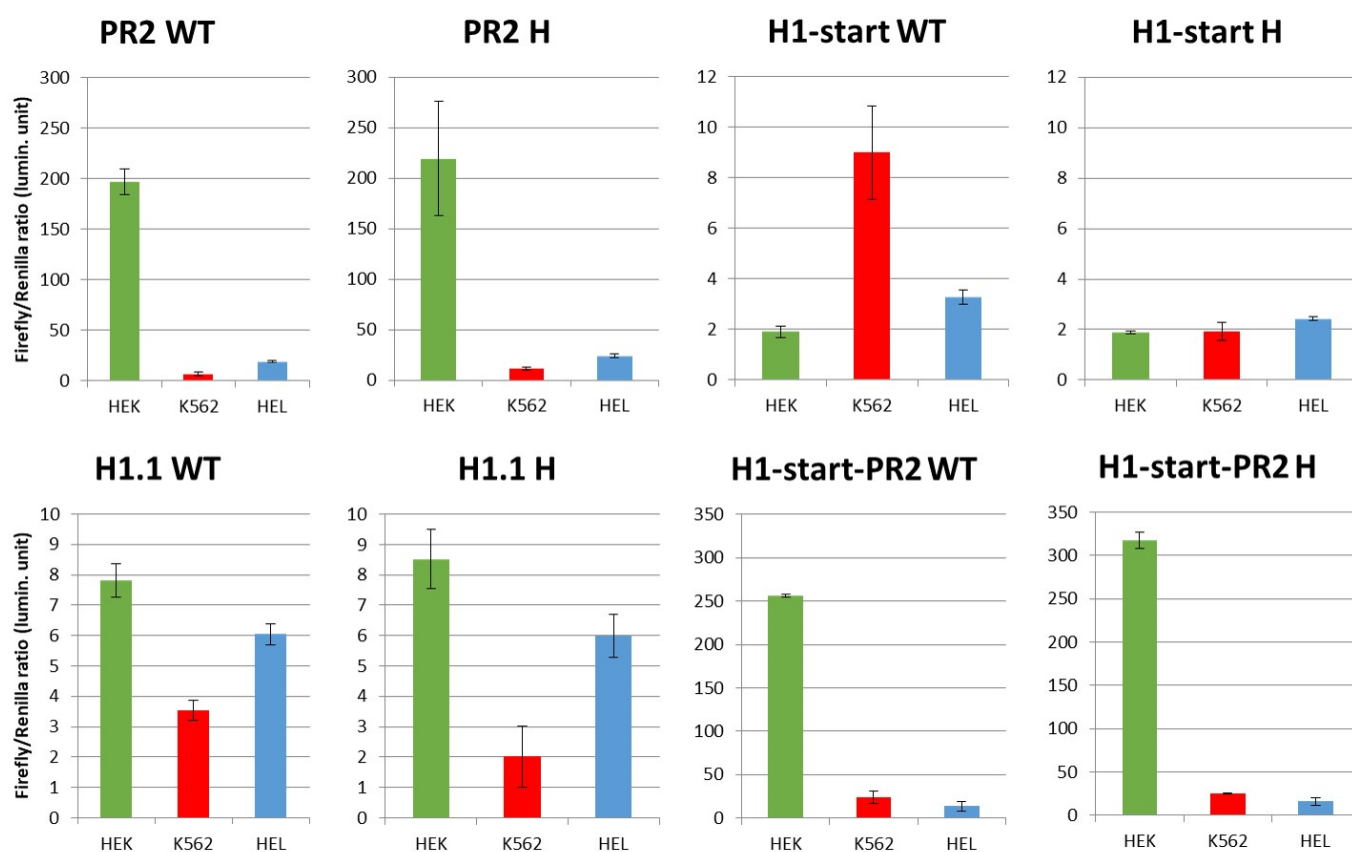

**Figure S2:** Dual-luciferase measurements with the examined H1st, H1.1, PR2, H1st-PR2 constructs in HEK, HEL92, K562 cells, data visualized prior normalization to HEK WT.
